# Supplementary material
Source: bioRxiv or medRxiv preprint supplement (https://medrxiv.org/highwire/filestream/69077/field_highwire_adjunct_files/2/19006221-11.pdf)
Supplement: Supplementary file [file 19006221-11.pdf]

**Table S4.** Sequence of oligonucleotides used for relative telomere length analysis and Deep Bisulfite Sequencing

| Target                                                | Primer sequence (5'-3')                                                                                | PCR conditions                                                        |
|-------------------------------------------------------|--------------------------------------------------------------------------------------------------------|-----------------------------------------------------------------------|
| Telomere repeats                                      | F: CGGTTTGGTTGGGTTTGGGTTTGGGTTTGGGTTTGGGTT<br>R: GGCTTGCCTTACCCTTACCCTTACCCTTACCCTTACCCT               | See text                                                              |
| HBG                                                   | F: TGTGCTGGCCCATCACTTTG<br>R: ACCAGCCACCACCTTTCTGATAGG                                                 | See text                                                              |
| BS21<br>( <i>MIR1471</i> ,<br><i>NPPC</i> )           | F: ctgcttctggcagcag-GGTTTTTAAATTAGAGTTAGTTGTGTTT<br>R: caggaaacagctatgac-CTAAAATAATTTTATCCCATTCCC      | 95°C, 15'; 50x(96°C, 15'';<br>56°C, 20''; 72°C, 30'');<br>72°C, 10'   |
| BS74 ( <i>EPO</i> ,<br><i>EPHB4</i> ,<br><i>ZAN</i> ) | F: ctgcttctggcagcag-GATAGTGTTTTTTGTTTTTAATTTATATA<br>R: caggaaacagctatgac-AATAATTTATCCAAAACCTATACC     | 95°C, 15'; 50x(96°C, 15'';<br>54°C, 20''; 72°C, 30'');<br>72°C, 10'   |
| BS88<br>( <i>LMX1B</i> ,<br><i>ZBTB43</i> )           | F: ctgcttctggcagcag-AAAATATATATGGTTTTTATTGAAT<br>R: caggaaacagctatgac-CCCAAATACTCCTACCCCTACTAC         | 95°C, 15'; 50x(96°C, 15'';<br>60°C, 20''; 72°C, 30'');<br>72°C, 10'   |
| BS134<br>( <i>SOX8</i> ,<br><i>SSTR5</i> )            | F: ctgcttctggcagcag-TATATGGAAATGGAGTTTGTAGTGTG<br>R: caggaaacagctatgac-CTTCTAAAAAACCCCAAAAACTT         | 95°C, 15'; 50x(96°C, 15'';<br>56°C, 20''; 72°C, 30'');<br>72°C, 10'   |
| ML15<br>( <i>LMNB2</i> ,<br><i>TIMM13</i> )           | F: ctgcttctggcagcag-TGGGTAGTTAGAATGTAGTTTGGT<br>R: caggaaacagctatgac-CACCATTTAATCAAATTAACCC            | 95°C, 15'; 50x(96°C, 15'';<br>56°C, 20''; 72°C, 30'');<br>72°C, 10'   |
| BS22<br>( <i>GBX2</i> ,<br><i>ASB18</i> )             | F: ctgcttctggcagcag-AGTATAATTTTGGTTTGTTTTTTTG<br>R: caggaaacagctatgac-CTTCTACCATATAAAATCCTACCC         | 95°C, 15'; 50x(96°C, 15'';<br>56°C, 20''; 72°C, 30'');<br>72°C, 10'   |
| BS71<br>( <i>SKAP2</i> ,<br><i>HOXA1</i> )            | F: ctgcttctggcagcag-ATATATAATTTTATGGGTTAAAGTTAGAA<br>R: caggaaacagctatgac-AATTAACCAACAACCTCCTAATAAATAC | 95°C, 15'; 50x(96°C, 15'';<br>56°C, 20''; 72°C, 30'');<br>72°C, 10'   |
| BS174<br>( <i>SHOX</i> ,<br><i>CRLF2</i> )            | F: ctgcttctggcagcag-TGATGGGTAATTTAGGATTGT<br>R: caggaaacagctatgac-AAACTCCCATTTCCAACAAAA                | 95°C, 15'; 50x(96°C, 15'';<br>56°C, 20''; 72°C, 30'');<br>72°C, 10'   |
| BS130<br>( <i>PWAR</i> ,<br><i>SNORD115-1</i> )       | F: ctgcttctggcagcag-TAAATAATTTAAAAGTAAAATGATGTAAGA<br>R: caggaaacagctatgac-AAAAAATTACAACCTTAACCTAAAC   | 95°C, 15'; 50x(96°C, 15'';<br>53.5°C, 20''; 72°C, 30'');<br>72°C, 10' |
| BS46<br>( <i>TRPC7</i> ,<br><i>SPOCK1</i> )           | F: ctgcttctggcagcag-TTATTAGAAGGAAGAAATTTTGAA<br>R: caggaaacagctatgac-AAAAAATAATAAAACCCAAAAACCTAT       | 95°C, 15'; 50x(96°C, 15'';<br>56°C, 20''; 72°C, 30'');<br>72°C, 10'   |
| MS12<br>( <i>BCL6B</i> ,<br><i>SLC16A13</i> )         | F: ctgcttctggcagcag-TTTTTATGTTTTTGTTTTTAGGGG<br>R: caggaaacagctatgac-CCCACCTCTTACAAATTTACCTTAA         | 95°C, 15'; 50x(96°C, 15'';<br>56°C, 20''; 72°C, 30'');<br>72°C, 10'   |
